# Supplementary material
Source: PubMed Central journal article supplement (PMC4838903)

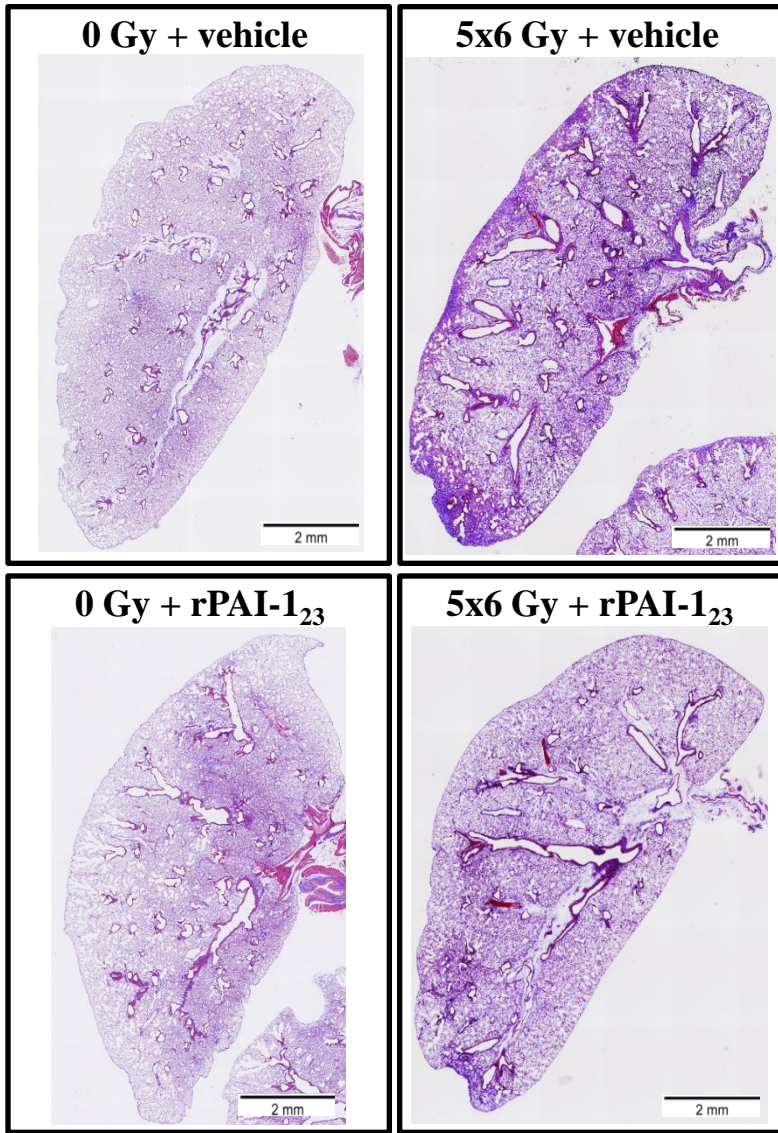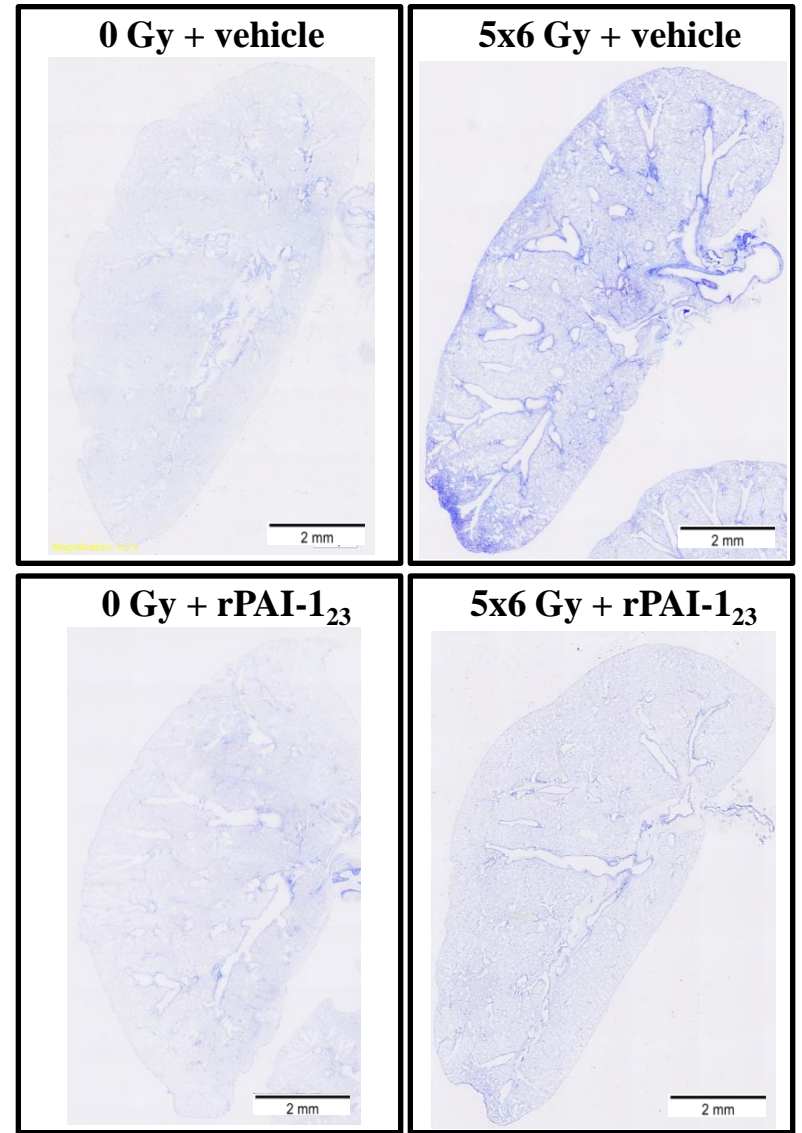

**A**

**B**

Supplement: NIHMS761418-supplement-2.pdf [file NIHMS761418-supplement-2.pdf]

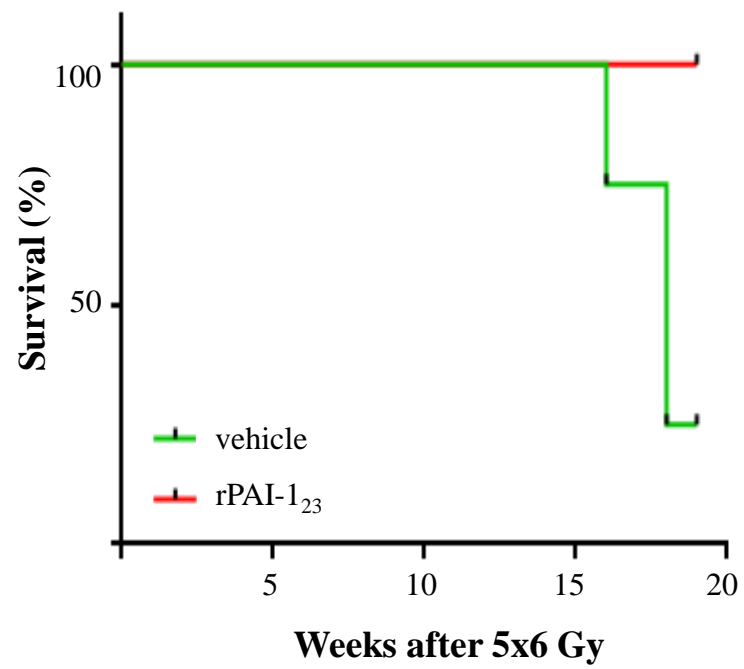

Supplemental Figure 2

Supplement: NIHMS761418-supplement-3.pdf [file NIHMS761418-supplement-3.pdf]

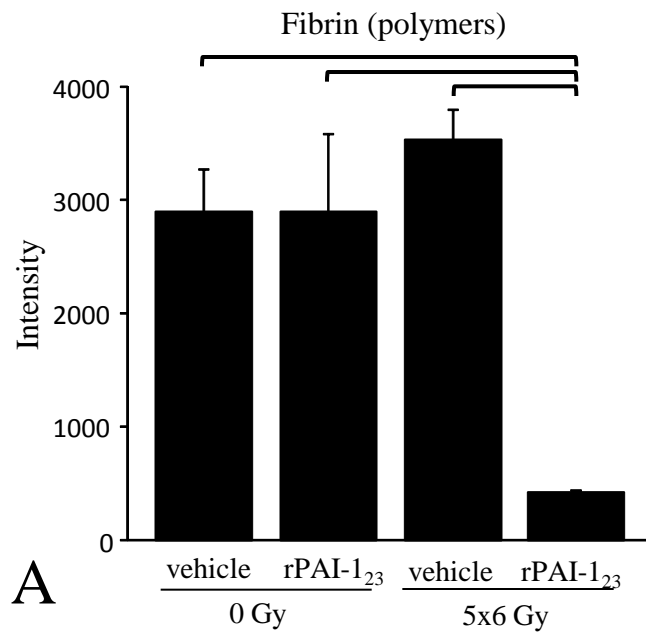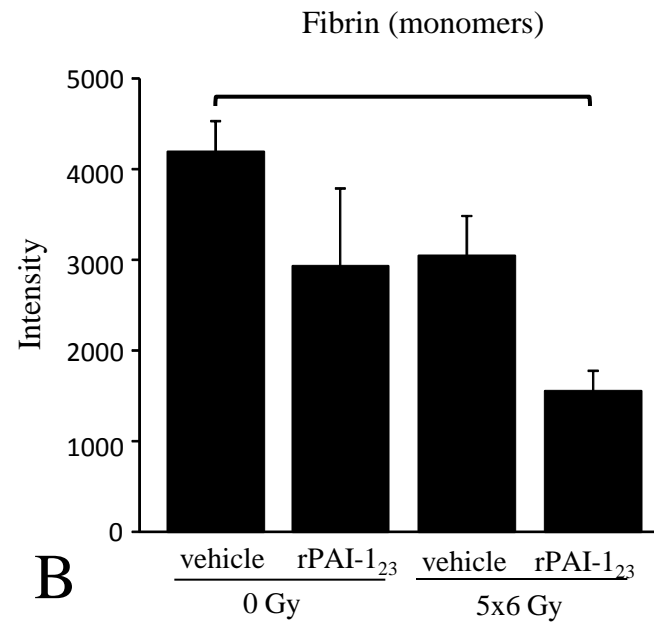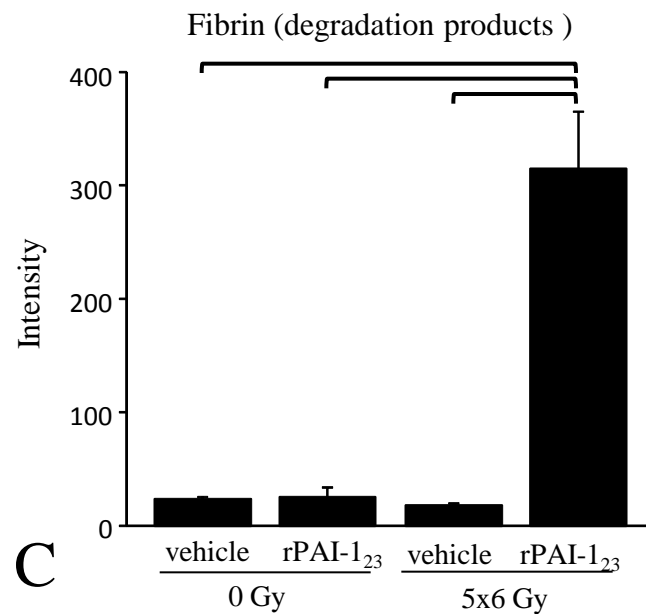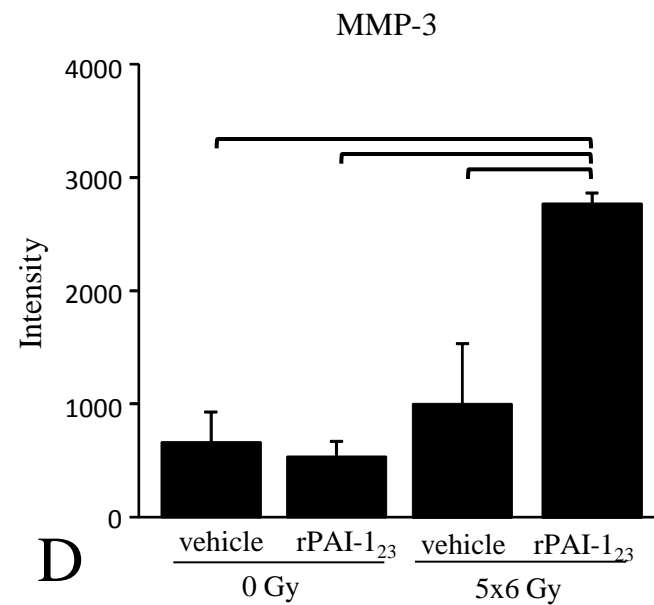

Supplemental Figure 3

Supplement: NIHMS761418-supplement-4.pdf [file NIHMS761418-supplement-4.pdf]
